# Supplementary material for: Uniform flower-like BiOBr/BiOI prepared by a new method: visible-light photocatalytic degradation, influencing factors and degradation mechanism
Source: Royal Society of Chemistry journal article supplement (doi:10.1039/c9nj03038g), 2019-01-01
Supplement: c9nj03038g1.pdf [file c9nj03038g1.pdf]

## Supplementary Material

### Uniform flower-like BiOBr/BiOI prepared by a new method: visible-light photocatalytic degradation, influencing factors and degradation mechanism

Jianhui Li, Quan Zhou, Fan Yang, Lijie Wu, Wenying Li, Ruipeng Ren\*, Yongkang Lv\*

Key Laboratory of Coal Science and Technology, Ministry of Education and Shanxi Province, Taiyuan University of Technology, No. 79 Yingze West Street, Taiyuan 030024, China

\*Corresponding author. Mailing address for correspondence: No. 79 Yingze West Street, Taiyuan 030024, China. E-mail address: renruipeng888@126.com (R.P. Ren); yongkanglv@163.com (Y.K. Lv).

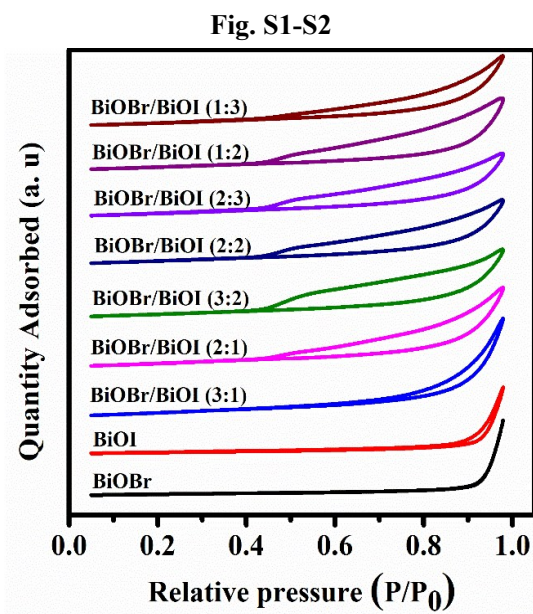

**Fig. S1** N<sub>2</sub> adsorption and desorption isotherms of BiOBr, BiOI and BiOBr/BiOI with different molar ratios.

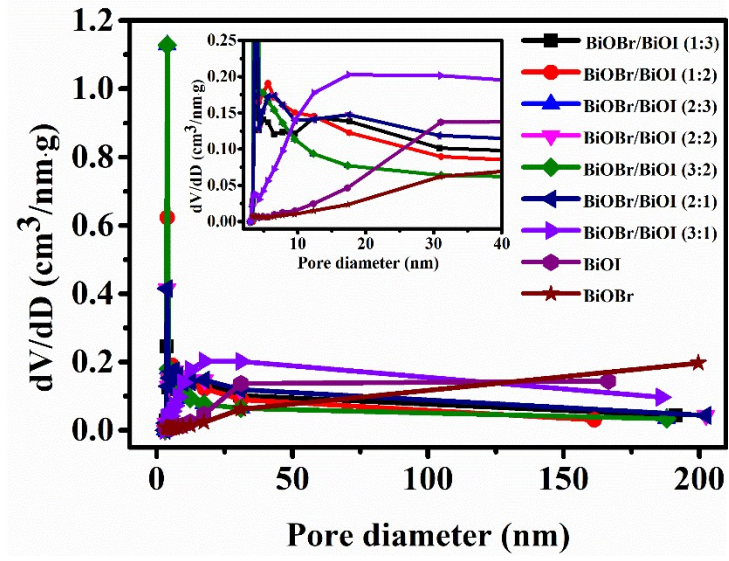

Fig. S2 Pore-size distribution curves of BiOBr, BiOI and BiOBr/BiOI with different molar ratios.
